# Supplementary material for: Inhibition of α-glucosidase activity and intestinal glucose transport to assess the in vivo anti-hyperglycemic potential of dodecyl-acylated phlorizin and polydatin derivatives
Source: Royal Society of Chemistry journal article supplement (doi:10.1039/d3fo05233h), 2024-01-01
Supplement: d3fo05233h1.pdf [file d3fo05233h1.pdf]

## Supplementary materials

**Title:** Inhibition of  $\alpha$ -glucosidase activity and intestinal glucose transport to assess *in vivo* anti-hyperglycemia potential of dodecyl-acylated phlorizin and polydatin derivatives

**Authors:** Zhengming Xu,<sup>a</sup> Kseniya Hileuskaya,<sup>c</sup> Aliaksandr Kraskouski,<sup>c</sup> Yujiao Yang,<sup>a</sup> Zhe Huang,<sup>a</sup> and Zhengang Zhao<sup>a, b, \*</sup>

### Affiliations:

<sup>a</sup> School of Food Science and Engineering, South China University of Technology, Guangzhou 510640, China;

<sup>b</sup> Guangdong Province Key Laboratory for Green Processing of Natural Products and Product Safety, South China University of Technology, 381 Wushan Road, Guangzhou 510640, China.

<sup>c</sup> Institute of Chemistry of New Materials, National Academy of Sciences of Belarus, Minsk, Belarus

### Corresponding Author:

\* Zhengang Zhao, Tel: (+86)-20-87113668; E-mail: [fezzg@scut.edu.cn](mailto:fezzg@scut.edu.cn), No.381 Wushan Road, South China University of Technology, Guangzhou 510640, China.

Table S1: Sequences of the primers used for RT-qPCR.

Table S2 Effect of dodecyl phlorizin and dodecyl polydatin on the secondary structure of  $\alpha$ -glucosidase.

Table S3 Information on catalytic and allosteric sites of  $\alpha$ -glucosidase molecule and docking box.

Table S4 Binding energy, inhibition constant and hydrogen bonds of substrate and inhibitors with catalytic and allosteric sites.

**Structure information:**

Figure S1: MS and MS/MS spectra of dodecyl phlorizin;

Figure S2: MS and MS/MS spectra of dodecyl polydatin;

Figure S3:  $^1\text{H}$  NMR of phlorizin and dodecyl phlorizin;

Figure S4:  $^{13}\text{C}$  NMR of phlorizin and dodecyl phlorizin;

Figure S5:  $^1\text{H}$  NMR of polydatin and dodecyl polydatin;

Figure S6:  $^{13}\text{C}$  NMR of polydatin and dodecyl polydatin.

Table S1 Sequences of the primers used for RT-qPCR

| Gene                                       | Direction | Primer (5'-3')          |
|--------------------------------------------|-----------|-------------------------|
| <i><math>\beta</math>-Actin</i>            | Forward   | TAGTTGCGTTACACCCTTTCTTG |
|                                            | Reverse   | TCACCTTCACCGTTCCAGTTT   |
| <i>SGLT1</i>                               | Forward   | TTCACGAAGTGGGAGGCTAT    |
|                                            | Reverse   | GAGTCGGCCCTTGGAGTGTA    |
| <i>GLUT2</i>                               | Forward   | ATGAGTGGGATGTTTGTGTTGTG |
|                                            | Reverse   | AACTCAGCCACCATGAACCA    |
| <i>PKA</i>                                 | Forward   | CCATCAAGGCTATATCCAGGTC  |
|                                            | Reverse   | TGCCTTATTGTAGCCCTTGC    |
| <i>Na<sup>+</sup>/K<sup>+</sup> ATPase</i> | Forward   | TTGGGGTTGCTATGGGGATT    |
|                                            | Reverse   | TTGGGGTTGCTATGGGGATT    |

Table S2 Effect of dodecyl phlorizin and dodecyl polydatin on the secondary structure of  $\alpha$ -glucosidase

| Compound          | Concentration<br>( $\mu$ M) | $\alpha$ -Helix<br>(%) | $\beta$ -Sheet<br>(%) | $\beta$ -Turn<br>(%) | Random coil<br>(%) |
|-------------------|-----------------------------|------------------------|-----------------------|----------------------|--------------------|
| Dodecyl phlorizin | 0                           | 43.8                   | 13.9                  | 16.7                 | 25.4               |
|                   | 50                          | 39.6                   | 17.7                  | 18.6                 | 24.1               |
|                   | 75                          | 32.7                   | 21.7                  | 18.4                 | 27.2               |
|                   | 90                          | 28.0                   | 24.6                  | 18.0                 | 29.4               |
| Dodecyl polydatin | 0                           | 43.8                   | 13.9                  | 16.7                 | 25.4               |
|                   | 50                          | 40.2                   | 17.9                  | 18.8                 | 23.2               |
|                   | 70                          | 37.4                   | 19.0                  | 18.6                 | 24.9               |
|                   | 90                          | 30.7                   | 22.7                  | 18.2                 | 28.4               |

Table S3 Information on catalytic and allosteric sites of  $\alpha$ -glucosidase molecule and docking box

| Sites             | Box coordinate<br>(X, Y, Z) | Box size<br>(X, Y, Z) | Volum<br>e [ $\text{\AA}^3$ ] | Surface<br>[ $\text{\AA}^2$ ] | Depth<br>[ $\text{\AA}$ ] |
|-------------------|-----------------------------|-----------------------|-------------------------------|-------------------------------|---------------------------|
| Catalytic site 1  | 20.04, -6.90, 21.77         | 40, 40, 40            | 191.49                        | 265.77                        | 10.91                     |
| Allosteric site 2 | 16.11, 11.76, 32.79         | 60, 40, 56            | 165.45                        | 371.65                        | 10.31                     |
| Allosteric site 3 | 12.86, -22.07, 14.89        | 50, 50, 60            | 156.57                        | 305.71                        | 8.62                      |
| Allosteric site 4 | 13.66, -11.01, 17.57        | 40, 40, 40            | 141.82                        | 319.39                        | 7.29                      |
| Allosteric site 5 | 14.09, 1.86, 0.05           | 50, 46, 48            | 69.63                         | 120.93                        | 5.43                      |

Table S4 Binding energy, inhibition constant and hydrogen bonds of substrate and inhibitors with catalytic and allosteric sites

| Compound          | Site | Binding energy (kcal/mol) | Inhibition constant | Hydrogen bond                                                            |
|-------------------|------|---------------------------|---------------------|--------------------------------------------------------------------------|
| pNPG              | 1    | -6.63                     | 13.91 $\mu$ M       | Asp69, asp215, glu277, arg315, asp352, gln353                            |
| Acarbose          | 1    | -4.29                     | 714.62 $\mu$ M      | Asp69, tyr158, arg213, asp215, glu277, gln279, arg315,<br>asp352, arg442 |
| Phlorizin         | 1    | -7.46                     | 3.4 $\mu$ M         | Asp69, his112, gln182, glu277, arg315, asp352, glu411, asn415            |
| Polydatin         | 1    | -7.32                     | 4.32 $\mu$ M        | Arg213, asp215, glu277, asn350, asp352, glu411                           |
| Dodecyl phlorizin | 1    | -1.8                      | 47.78 mM            | Tyr158, glu277, gln279, his280, asp352, glu411, arg442                   |
|                   | 2    | -7.27                     | 4.65 $\mu$ M        | Asn259, arg270, ser291, his295, glu296                                   |
|                   | 3    | -5.38                     | 113.46 $\mu$ M      | Asn235, asn317, asn415, glu429                                           |
|                   | 4    | -7.29                     | 4.54 $\mu$ M        | Asp242, gln279, glu411, asn415                                           |
|                   | 5    | -4.63                     | 2.68 mM             | Phe321, thr358, asp362, ser545                                           |
| Dodecyl polydatin | 1    | -5.17                     | 162.9 $\mu$ M       | Asp69, gln279, his280, arg315, glu411                                    |

---

|   |       |               |                                                        |
|---|-------|---------------|--------------------------------------------------------|
| 2 | -6.74 | 11.51 $\mu$ M | Asn259, arg263, arg270, ile272, his295, asp341         |
| 3 | -6.07 | 35.25 $\mu$ M | Gly161, asp233, ser311, asn317, glu422                 |
| 4 | -8.60 | 497.09 nM     | Lys156, asp242, asp307, thr310, leu313, arg315, asn415 |
| 5 | -6.0  | 40.24 $\mu$ M | Leu323, phe360, asp362, lys523                         |

---

Lauryl Phlorizin ms #19 RT: 0.22 AV: 1 NL: 6.80E6  
T: + c ESI Q1MS [50.000-1200.000]

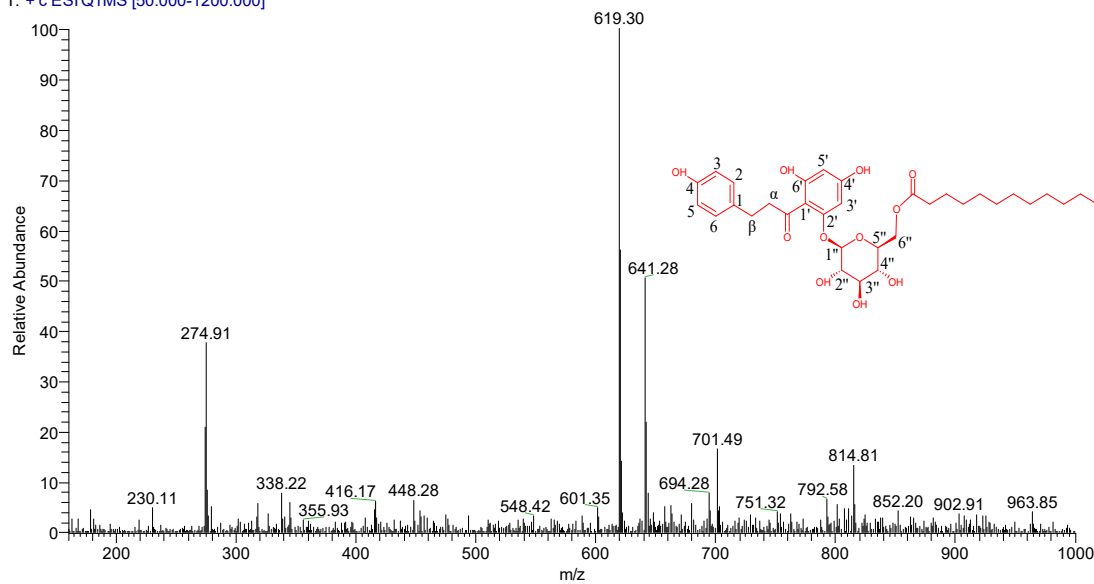

Lauryl Phlorizin ms2 #152 RT: 1.38 AV: 1 NL: 3.27E5  
T: + c ESI Full ms2 619.270 [40.000-1200.000]

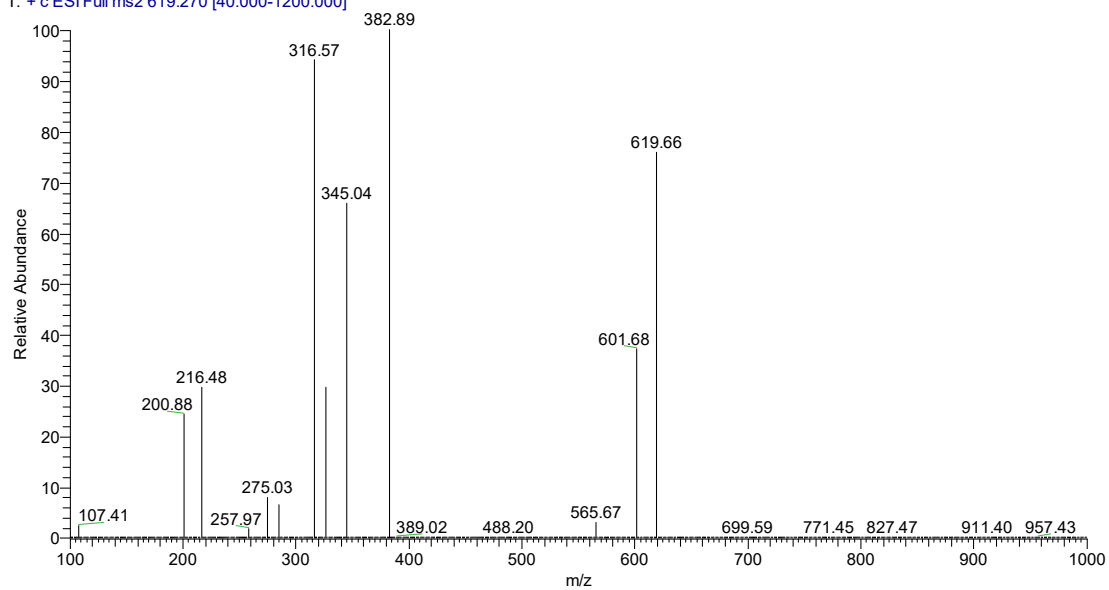

Figure S1 MS and MS/MS spectra of dodecyl phlorizin



Lauryl Polydatin ms #19 RT: 0.23 AV: 1 NL: 1.69E7  
T: + c ESI Q1MS [50.000-1200.000]

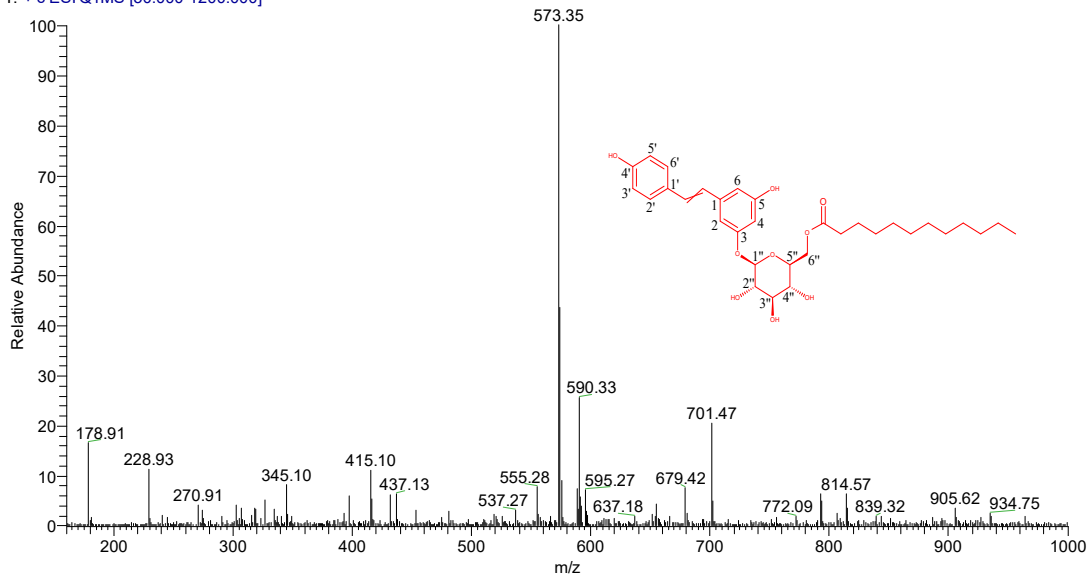

Lauryl Polydatin ms2 #39 RT: 0.35 AV: 1 NL: 2.32E6  
T: + c ESI Full ms2 573.290 [40.000-1200.000]

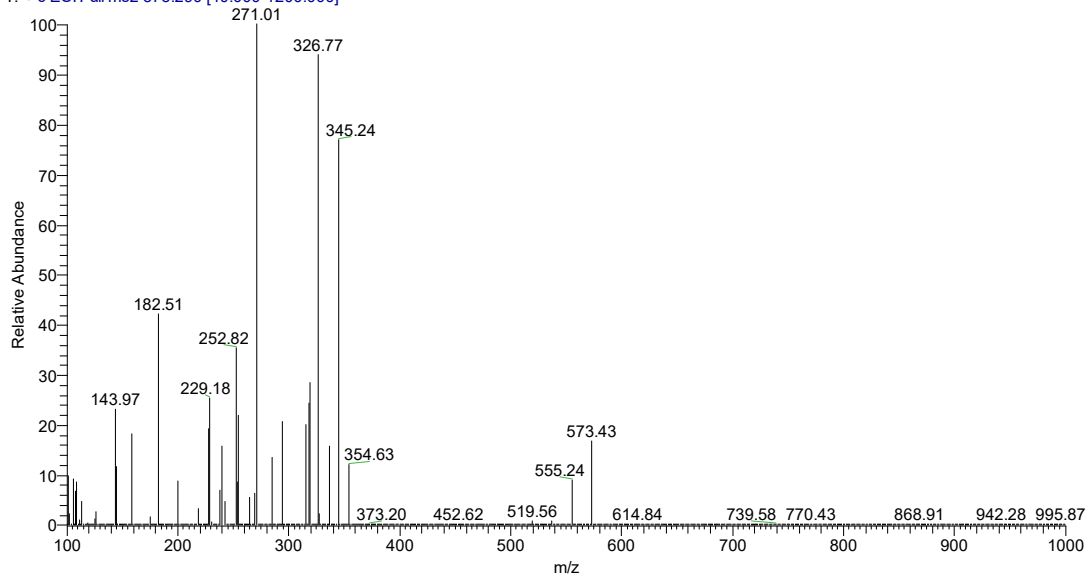

Figure S2 MS and MS/MS spectra of dodecyl polydatin

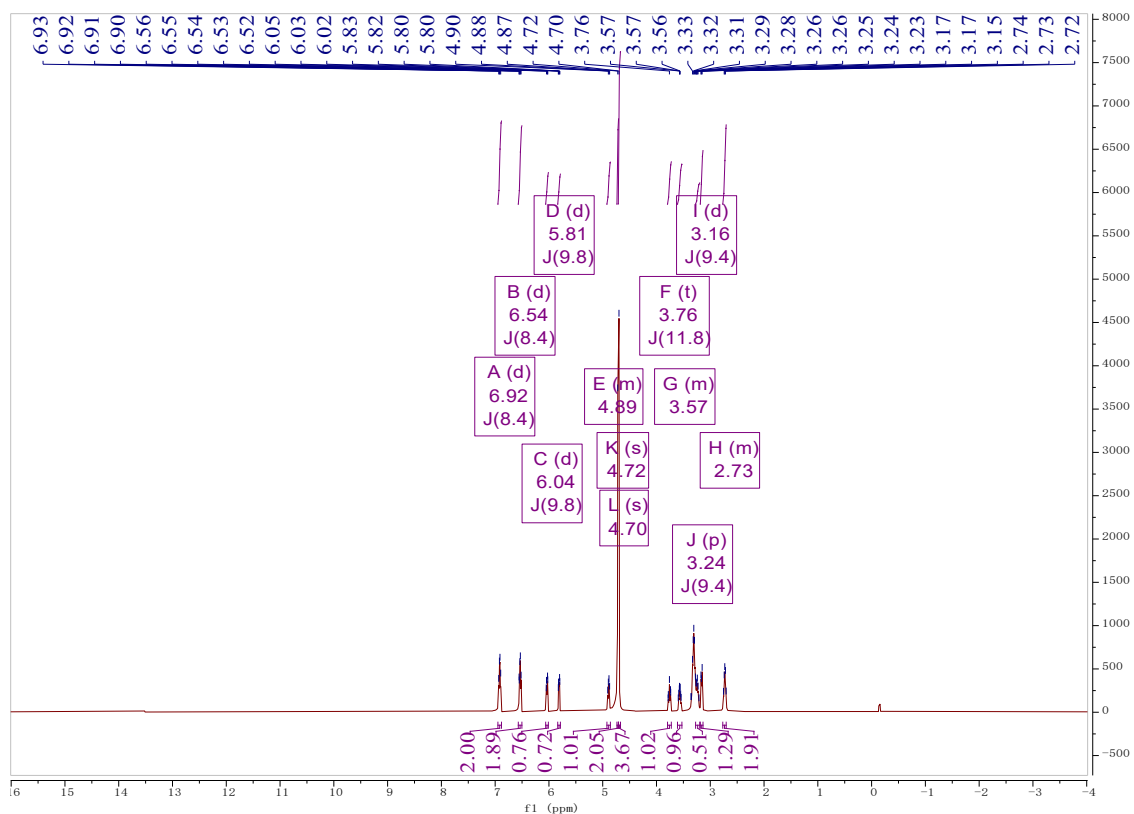

Figure S3a  $^1\text{H}$  NMR of phlorizin

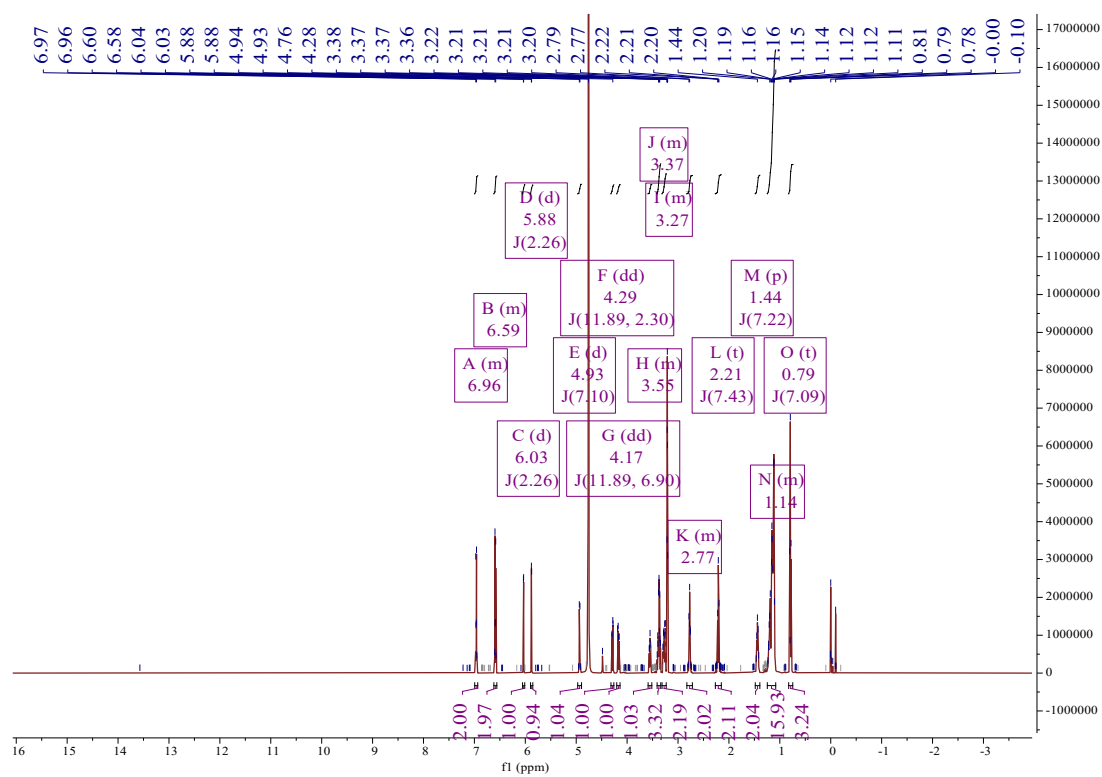

Figure S3b  $^1\text{H}$  NMR of dodecyl phlorizin

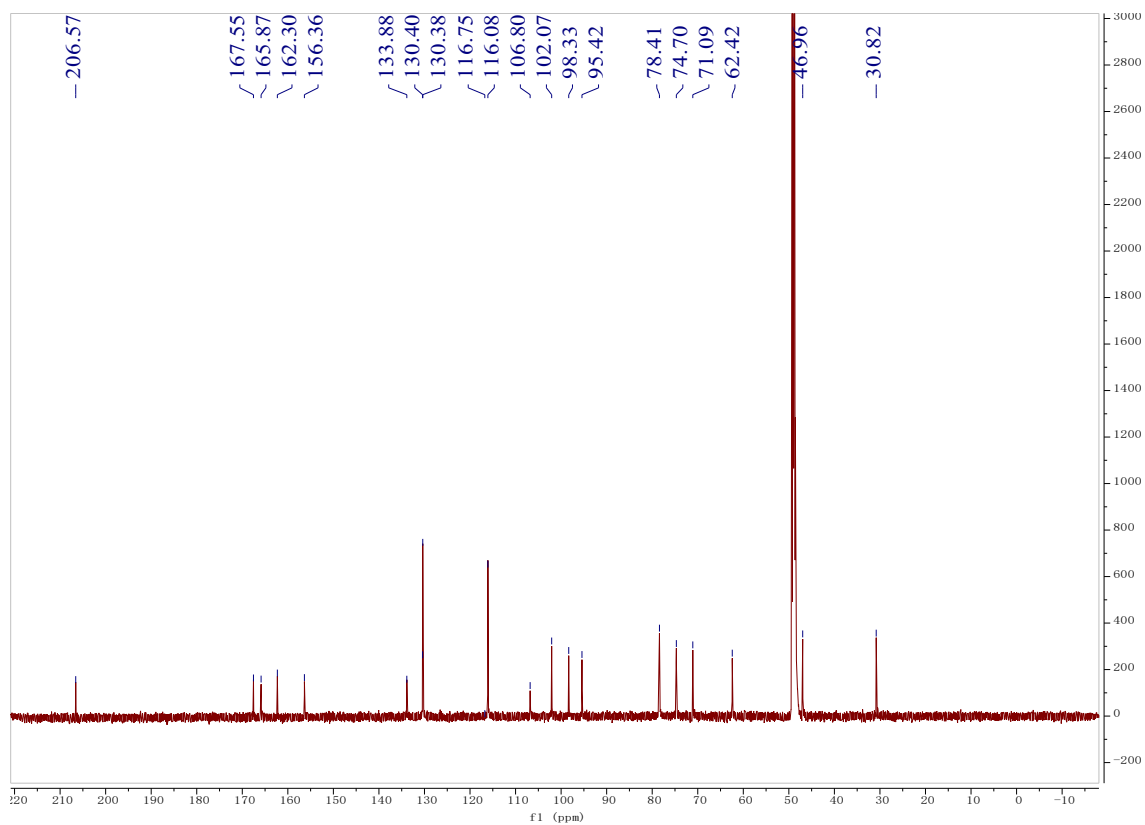

Figure S4a  $^{13}\text{C}$  NMR of phlorizin

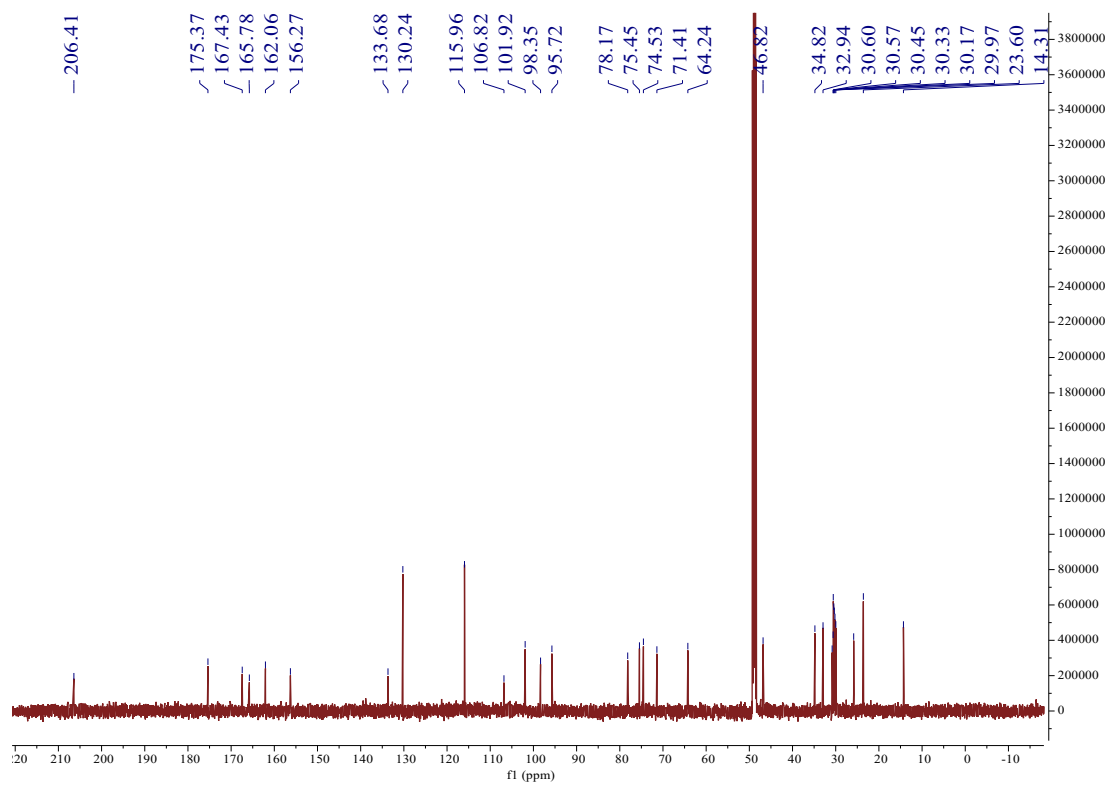

Figure S4b  $^{13}\text{C}$  NMR of dodecyl phlorizin

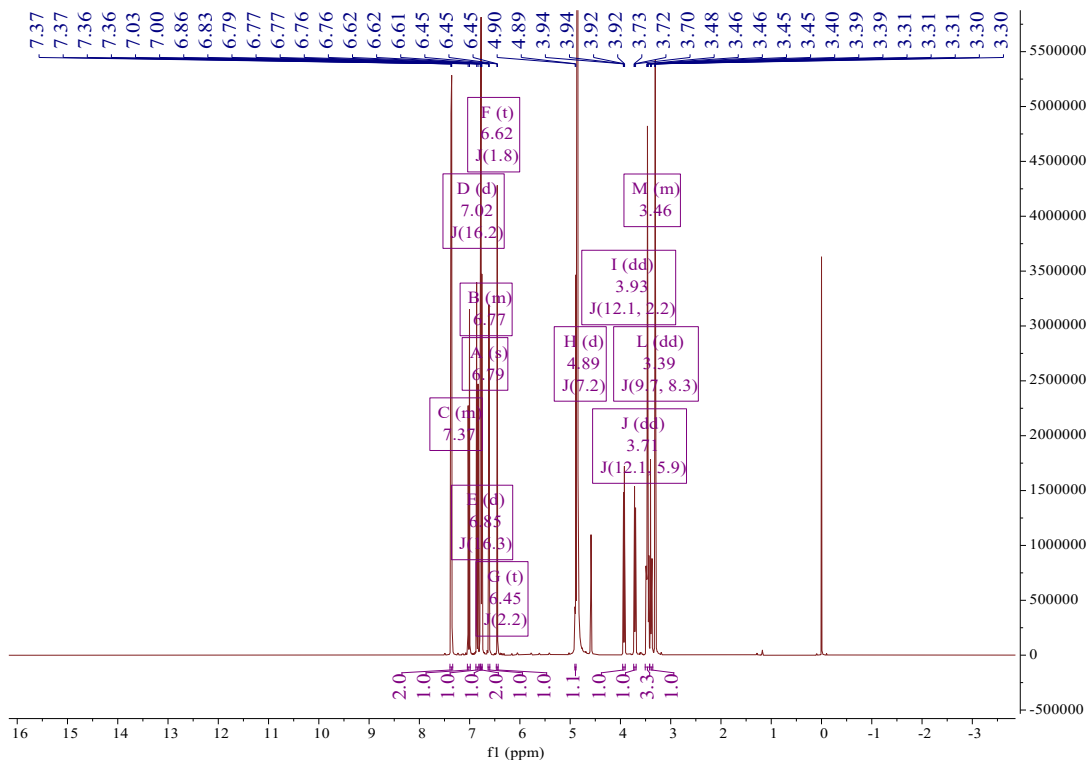

Figure S5a <sup>1</sup>H NMR of polydatin

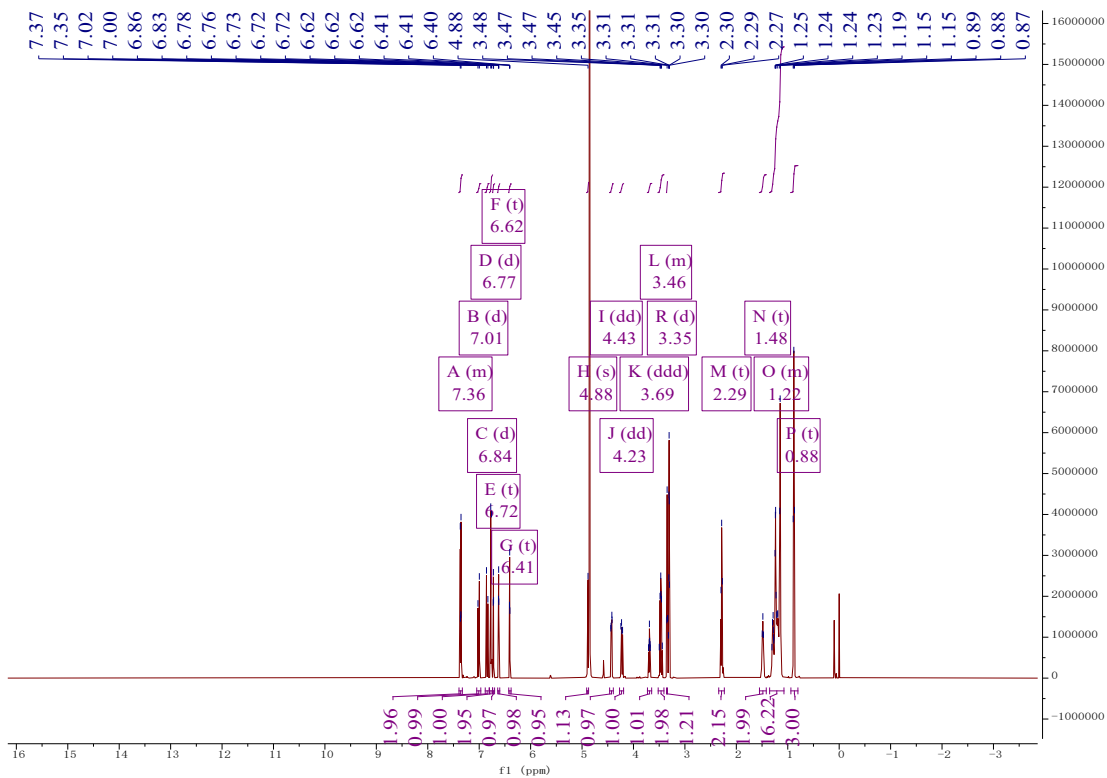

Figure S5b <sup>1</sup>H NMR of dodecyl polydatin

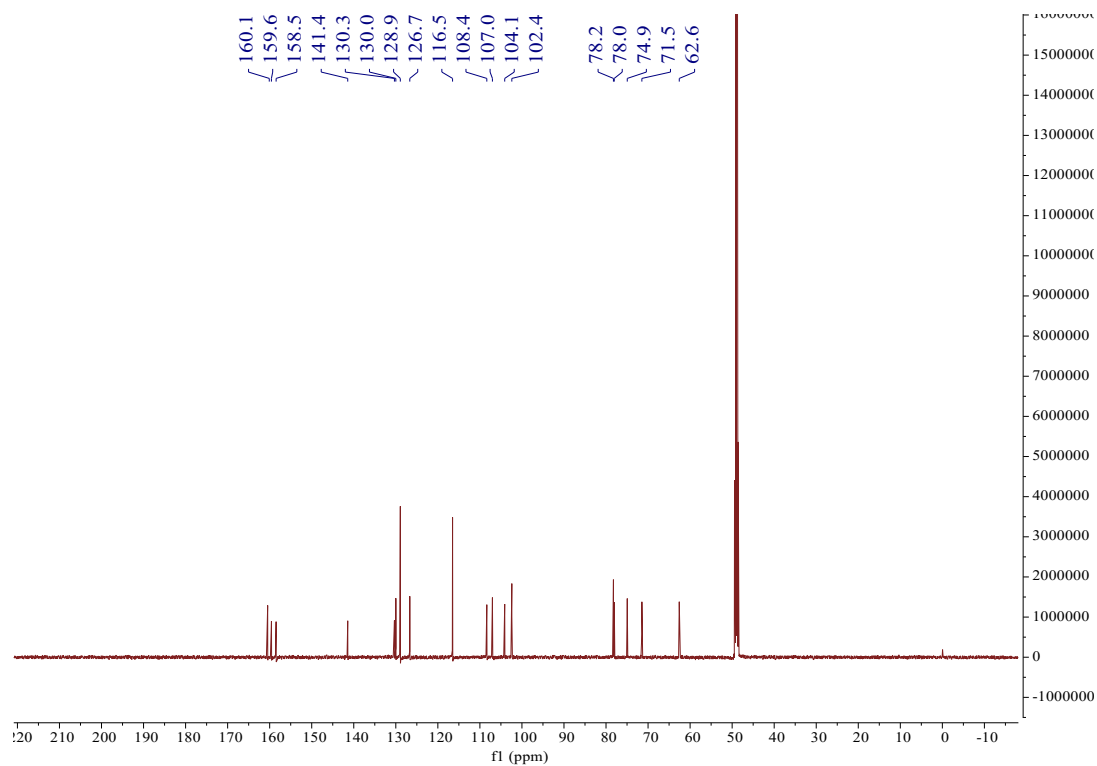

Figure S6a  $^{13}\text{C}$  NMR of polydatin

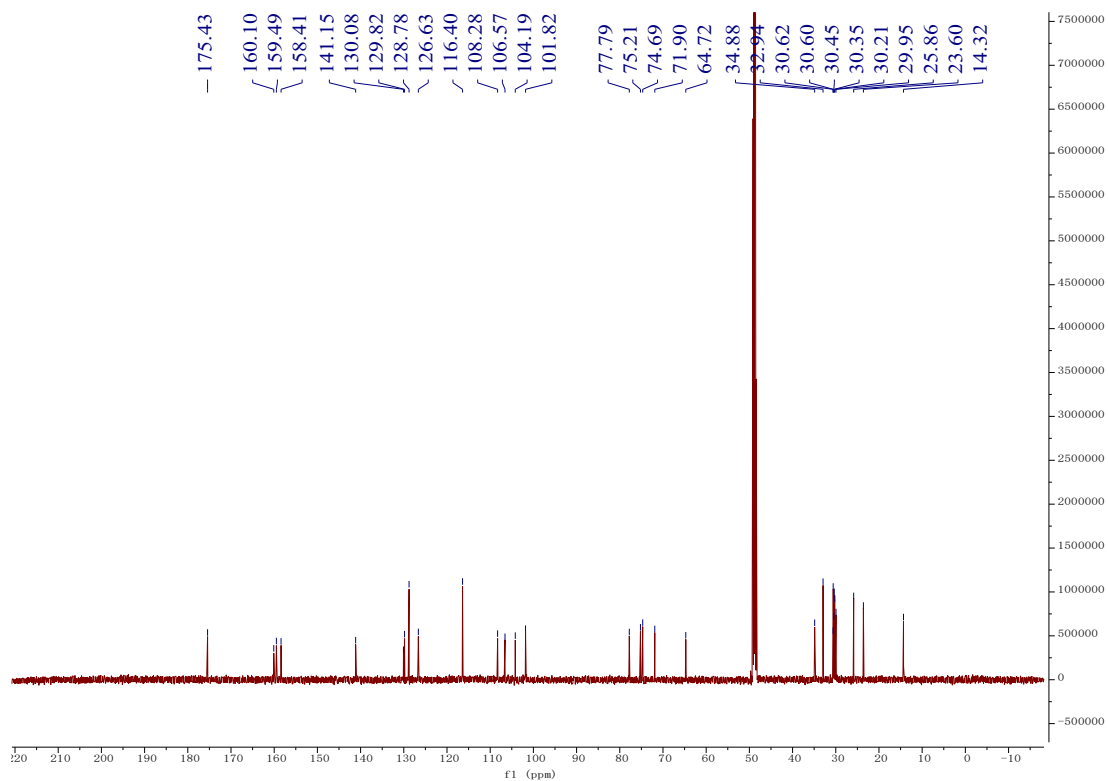

Figure S6b  $^{13}\text{C}$  NMR of dodecyl polydatin
